# Supplementary material for: Fabrication of a novel electrochemical sensor for the determination of water in some organic solvents based on naphthalene conducting polymers
Source: Royal Society of Chemistry journal article supplement (doi:10.1039/c8nj02767f), 2018-01-01
Supplement: c8nj02767f1.pdf [file c8nj02767f1.pdf]

## *Supporting Information for*

# **Fabrication of a novel electrochemical sensor for determination of water in some organic solvents based on naphthalene conducting polymers**

Safoura Bakhtiari Haft Lang<sup>a</sup>, Elmira Azizi<sup>b</sup>, Jalal Arjomandi<sup>b,\*</sup>, Davood Nematollahi<sup>b</sup> and Ahmad Reza Massah<sup>a</sup>,

<sup>a</sup>Department of Chemistry, Shahreza Branch, Islamic Azad University, Shahreza, Isfahan 86145-311, Iran

<sup>b</sup>Faculty of Chemistry, Bu-Ali Sina University, Hamedan, 65178, Iran

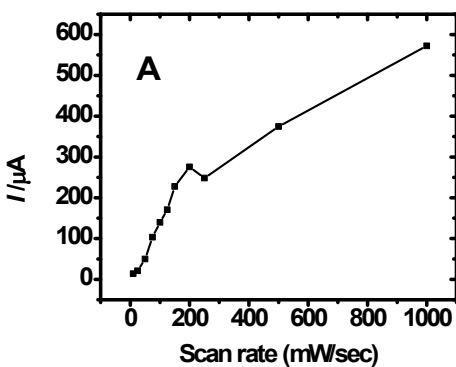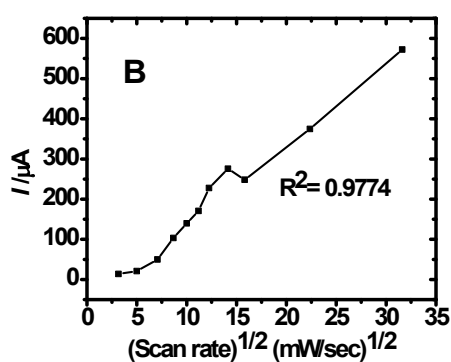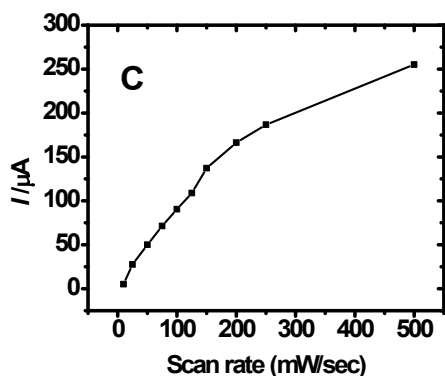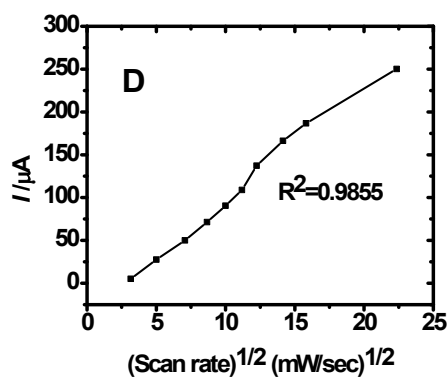

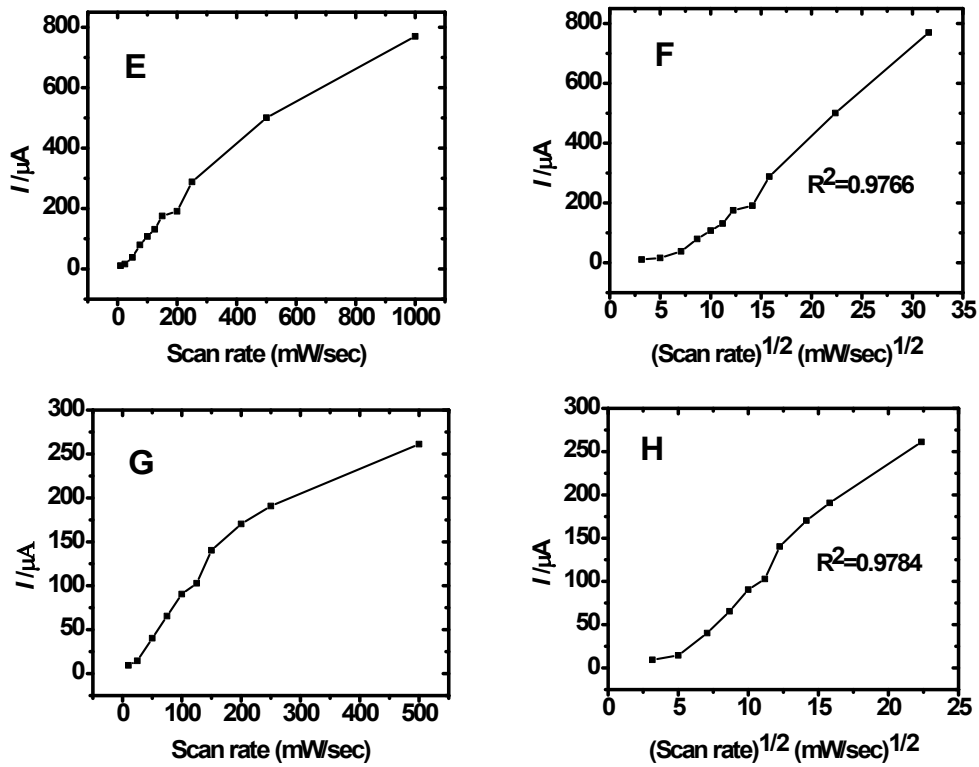

**Fig. 1S** Scan rate and square root of scan rates dependency of the current for (A, B) PDAN, (C, D) PDHN, (E, F) PDAN/TiO<sub>2</sub> and (G, H) P(DAN-co-DHN) films

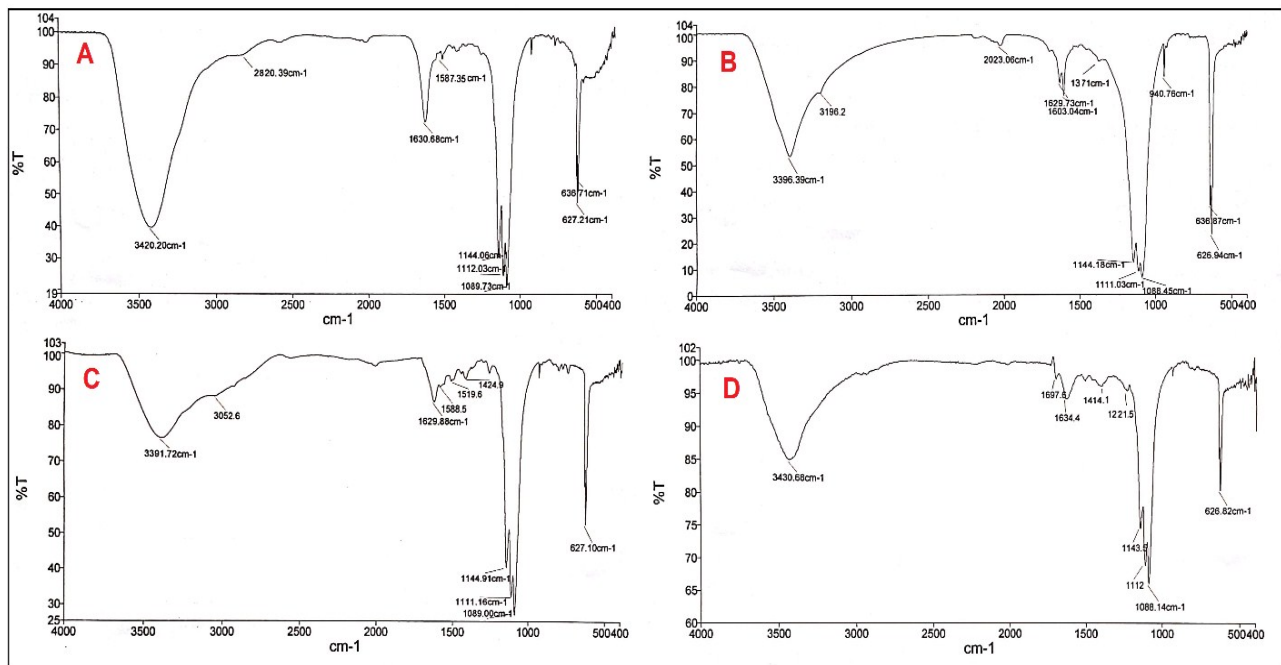

**Fig. 2S** FT-IR spectra of PDAN (A), PDHN (B), PDAN/TiO<sub>2</sub> (C) and P(DAN-co-DHN) (D) films

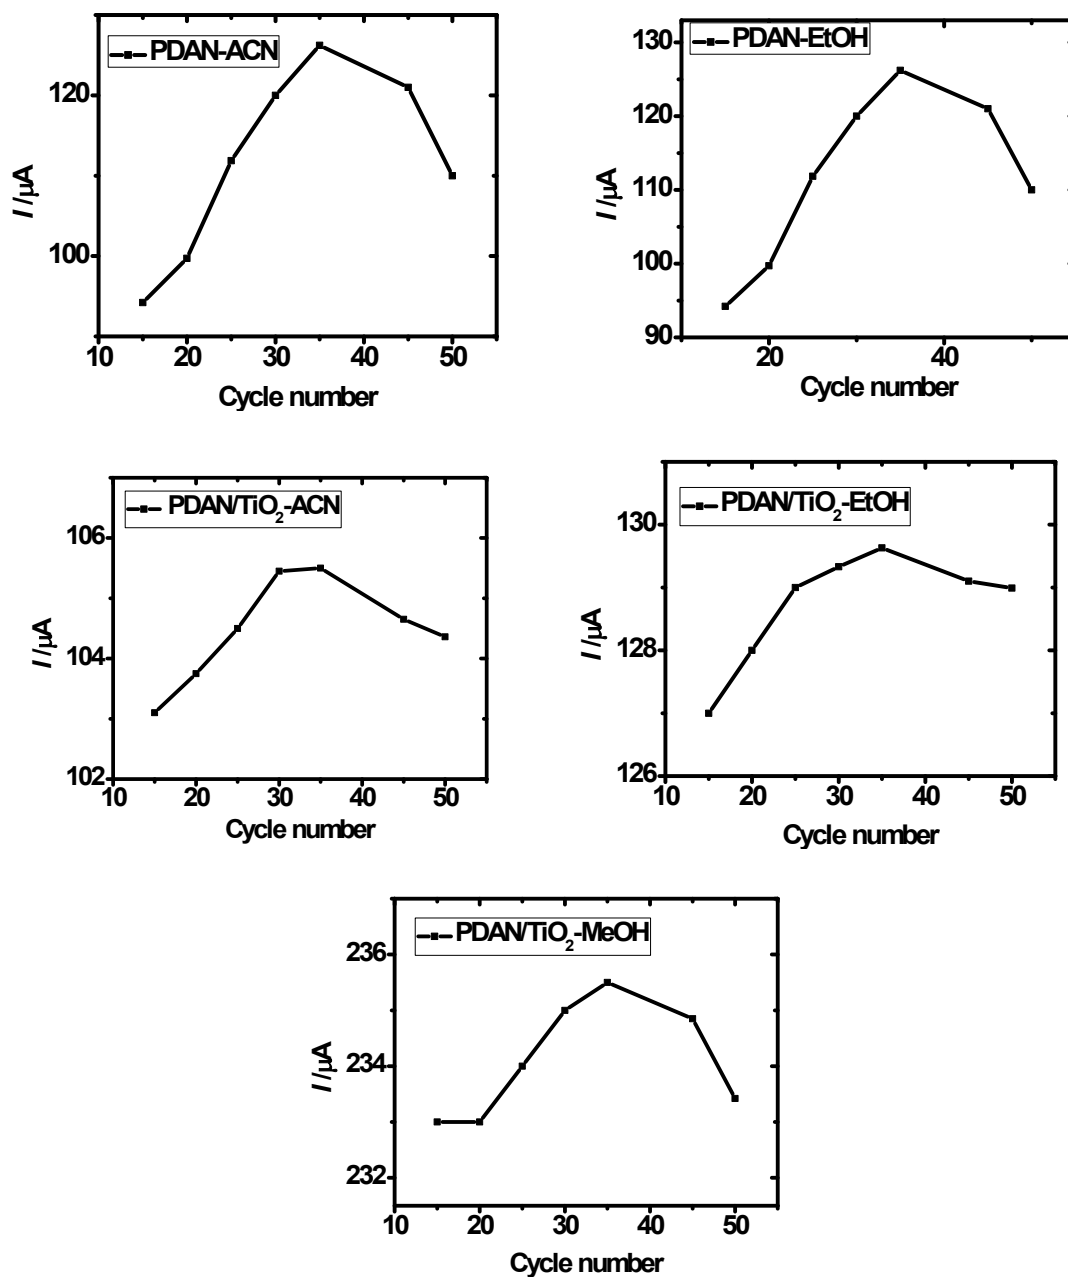

**Fig. 3S** Cycle number dependency of the current of PDAN and PDAN/TiO<sub>2</sub> electrodes recorded for the ACN, EtOH and MeOH solutions

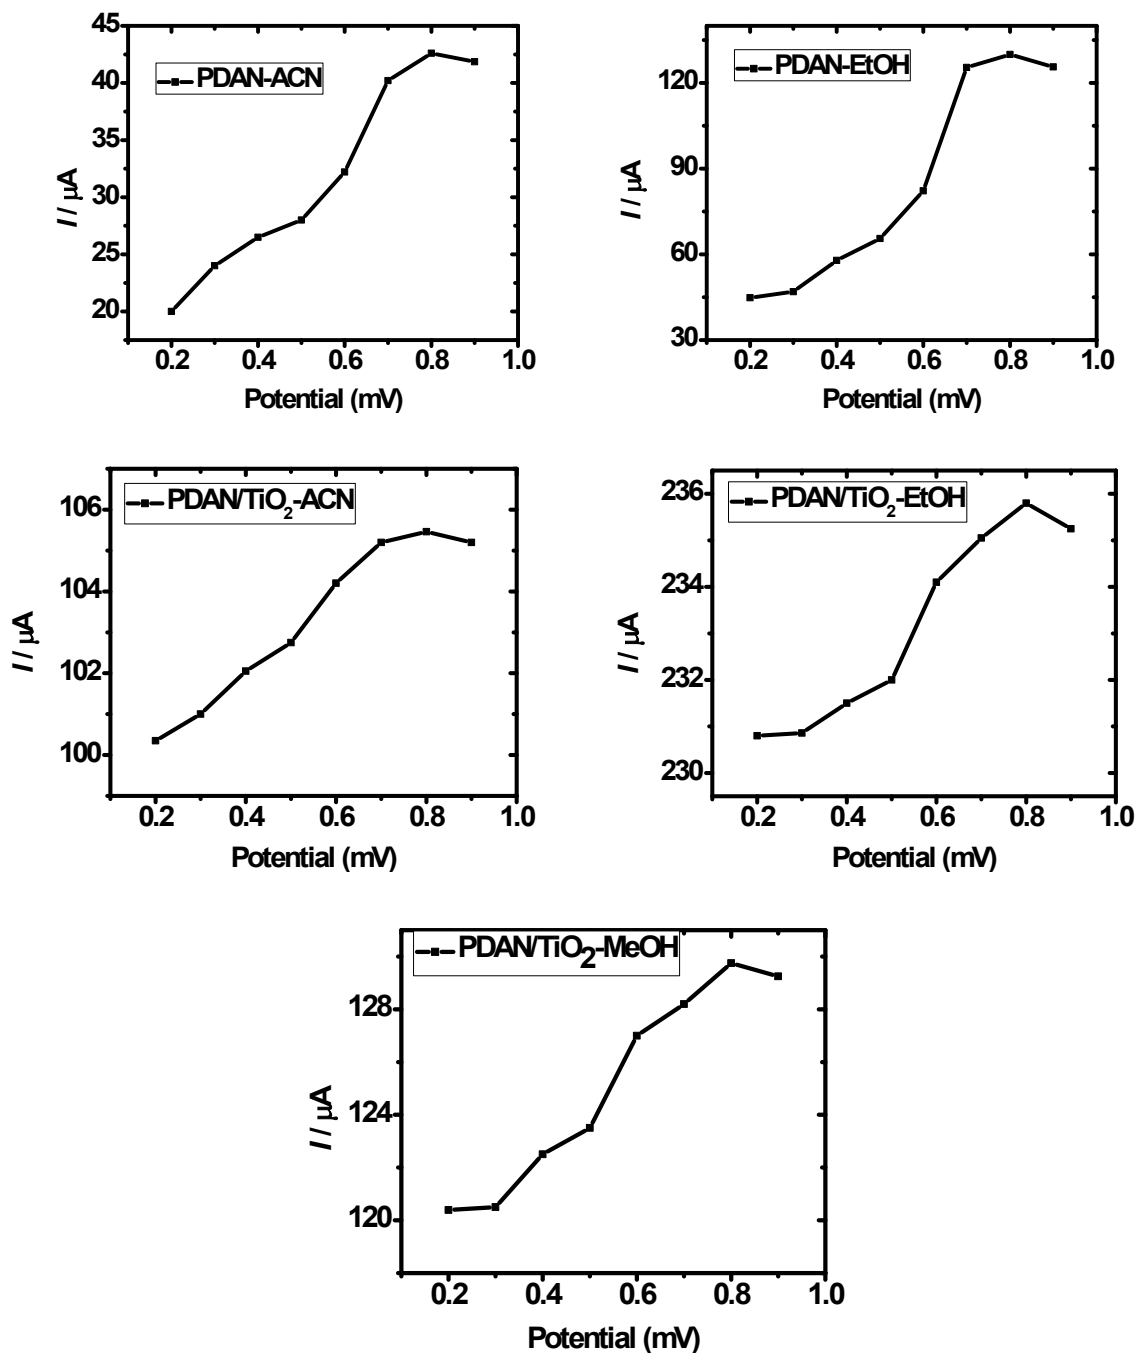

**Fig. 4S** Response potential dependency of the current of PDAN and PDAN/TiO<sub>2</sub> electrodes recorded for the ACN, EtOH and MeOH solutions

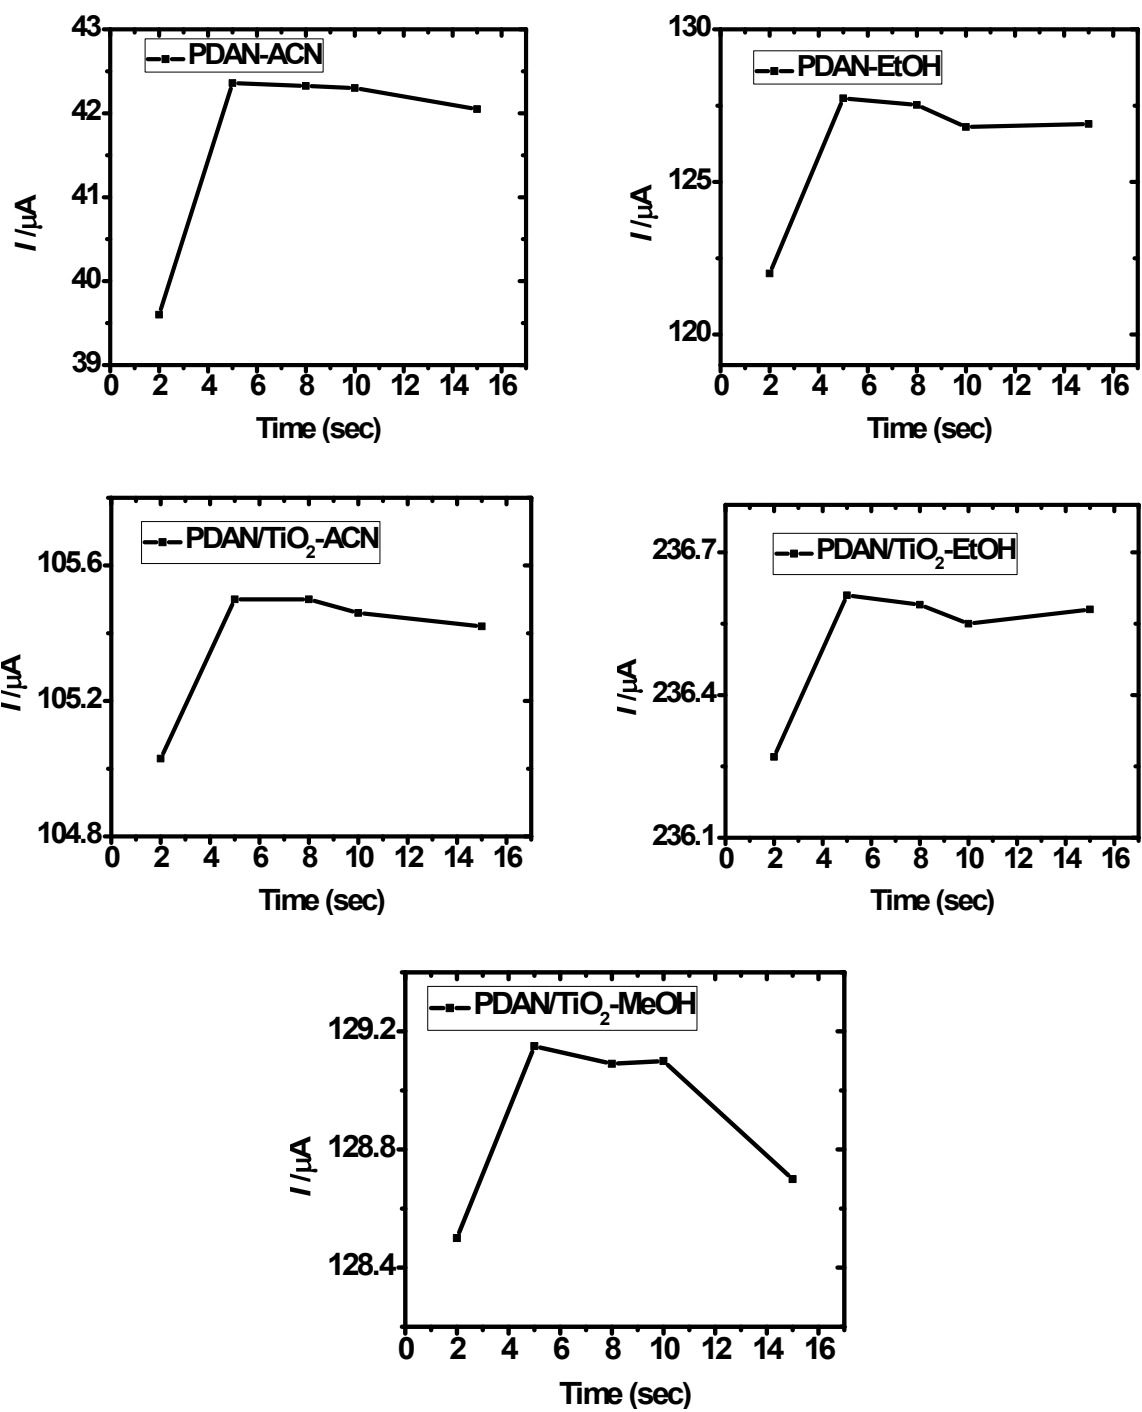

Fig. 5S Response time dependency of the current of PDAN and PDAN/TiO<sub>2</sub> electrodes recorded for the ACN, EtOH and MeOH solutions

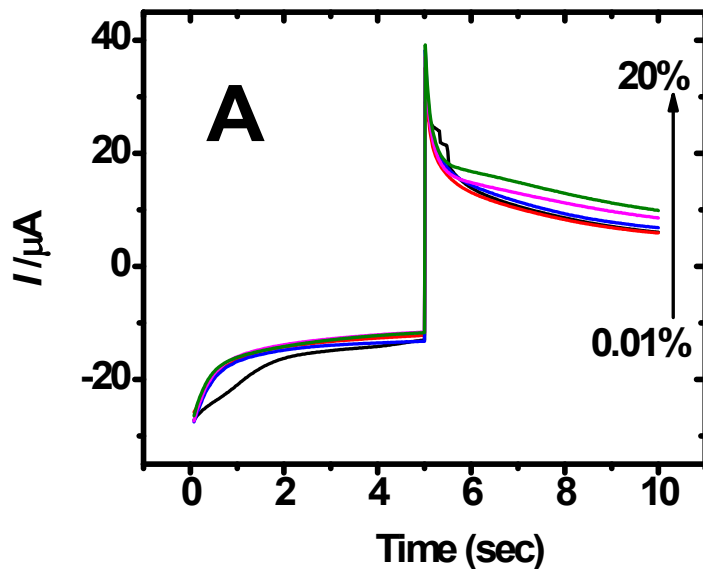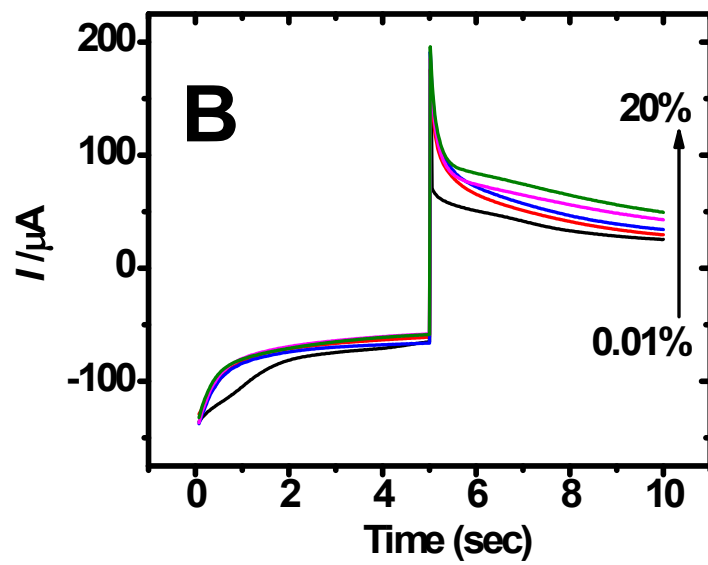

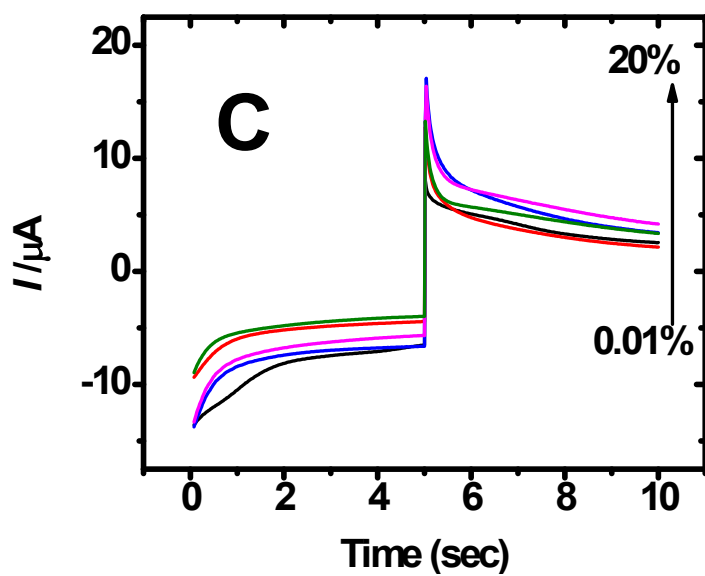

**Fig. 6S** The response time of the Au/PDHN electrode to changes in the water content of (A) ACN, (B) EtOH and (C) MeOH solutions under optimizes conditions. (Inset): Calibration plots for determining water content in solutions.

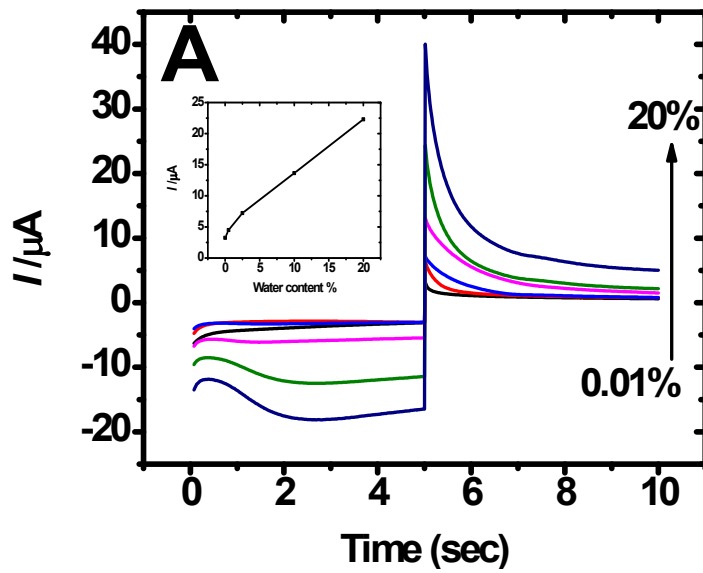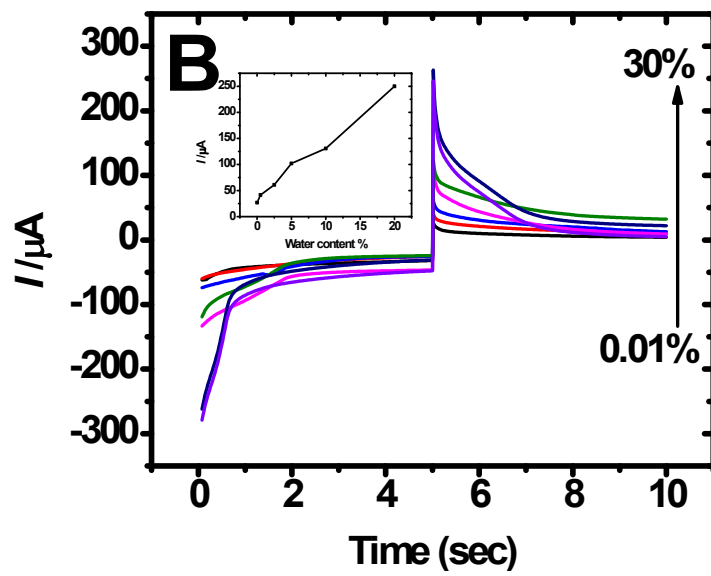



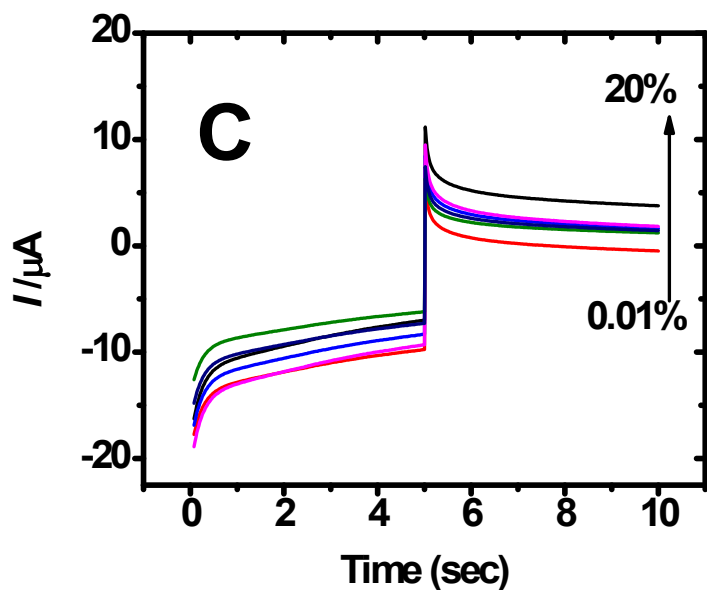

**Fig. 7S** The response time of the Au/P(DAN-co-PDHN) electrode to changes in the water content of (A) ACN, (B) EtOH and (C) MeOH solutions under optimizes conditions. (Inset): Calibration plots for determining water content in solutions.
